# Supplementary material
Source: ML conference proceedings conference paper supplement (https://openreview.net/forum?id=UKJkad8aUF)
Supplement: supplementary_material [file References.pdf › References.pdf]

## References

- [1] Tara Akhound-Sadegh, Jarrid Rector-Brooks, Avishek Joey Bose, Sarthak Mittal, Pablo Lemos, Cheng-Hao Liu, Marcin Sendera, Siamak Ravanbakhsh, Gauthier Gidel, Yoshua Bengio, et al. Iterated denoising energy matching for sampling from boltzmann densities. In *Proceedings of the 41st International Conference on Machine Learning*, pages 760–786, 2024.
- [2] Michael S Albergo and Eric Vanden-Eijnden. Nets: A non-equilibrium transport sampler. *arXiv preprint arXiv:2410.02711*, 2024.
- [3] Emmanuel Bengio, Moksh Jain, Maksym Korablyov, Doina Precup, and Yoshua Bengio. Flow network based generative models for non-iterative diverse candidate generation. *Advances in Neural Information Processing Systems*, 34:27381–27394, 2021.
- [4] Yoshua Bengio, Salem Lahlou, Tristan Deleu, Edward J Hu, Mo Tiwari, and Emmanuel Bengio. Gflownet foundations. *Journal of Machine Learning Research*, 24(210):1–55, 2023.
- [5] Julius Berner, Lorenz Richter, and Karen Ullrich. An optimal control perspective on diffusion-based generative modeling. *arXiv preprint arXiv:2211.01364*, 2022.
- [6] Julius Berner, Lorenz Richter, Marcin Sendera, Jarrid Rector-Brooks, and Nikolay Malkin. From discrete-time policies to continuous-time diffusion samplers: Asymptotic equivalences and faster training. *arXiv preprint arXiv:2501.06148*, 2025.
- [7] Andrew Campbell, Jason Yim, Regina Barzilay, Tom Rainforth, and Tommi Jaakkola. Generative flows on discrete state-spaces: Enabling multimodal flows with applications to protein co-design. In *International Conference on Machine Learning*, pages 5453–5512. PMLR, 2024.
- [8] Wuhao Chen, Zijing Ou, and Yingzhen Li. Neural flow samplers with shortcut models. *arXiv preprint arXiv:2502.07337*, 2025.
- [9] KyungHyun Cho, Alexander Ilin, and Tapani Raiko. Improved learning of gaussian-bernoulli restricted boltzmann machines. In *Artificial Neural Networks and Machine Learning–ICANN 2011: 21st International Conference on Artificial Neural Networks, Espoo, Finland, June 14–17, 2011, Proceedings, Part I 21*, pages 10–17. Springer, 2011.
- [10] Valentin De Bortoli, Michael Hutchinson, Peter Wirsberger, and Arnaud Doucet. Target score matching. *arXiv preprint arXiv:2402.08667*, 2024.
- [11] Jean-Pierre Falet, Hae Beom Lee, Nikolay Malkin, Chen Sun, Dragos Secrieru, Thomas Jiralerspong, Dinghuai Zhang, Guillaume Lajoie, and Yoshua Bengio. Delta-ai: Local objectives for amortized inference in sparse graphical models. *arXiv preprint arXiv:2310.02423*, 2023.
- [12] Andrew Gelman, John B Carlin, Hal S Stern, and Donald B Rubin. *Bayesian data analysis*. Chapman and Hall/CRC, 1995.
- [13] Stuart Geman and Donald Geman. Stochastic relaxation, gibbs distributions, and the bayesian restoration of images. *IEEE Transactions on pattern analysis and machine intelligence*, (6): 721–741, 1984.
- [14] Ulf Grenander and Michael I Miller. Representations of knowledge in complex systems. *Journal of the Royal Statistical Society: Series B (Methodological)*, 56(4):549–581, 1994.
- [15] W Keith Hastings. Monte carlo sampling methods using markov chains and their applications. 1970.
- [16] Peter Holderrieth, Marton Havasi, Jason Yim, Neta Shaul, Itai Gat, Tommi Jaakkola, Brian Karrer, Ricky TQ Chen, and Yaron Lipman. Generator matching: Generative modeling with arbitrary markov processes. *arXiv preprint arXiv:2410.20587*, 2024.
- [17] Peter Holderrieth, Michael S Albergo, and Tommi Jaakkola. Leaps: A discrete neural sampler via locally equivariant networks. *arXiv preprint arXiv:2502.10843*, 2025.
- [18] Zhifeng Kong, Wei Ping, Jiaji Huang, Kexin Zhao, and Bryan Catanzaro. Diffwave: A versatile diffusion model for audio synthesis. *arXiv preprint arXiv:2009.09761*, 2020.

- [19] Salem Lahlou, Tristan Deleu, Pablo Lemos, Dinghuai Zhang, Alexandra Volokhova, Alex Hernández-García, Léna Néhale Ezzine, Yoshua Bengio, and Nikolay Malkin. A theory of continuous generative flow networks. In *International Conference on Machine Learning (ICML)*, pages 18269–18300. PMLR, 2023.
- [20] Xiang Li, John Thickstun, Ishaan Gulrajani, Percy S Liang, and Tatsunori B Hashimoto. Diffusion-lm improves controllable text generation. *Advances in neural information processing systems*, 35:4328–4343, 2022.
- [21] Yaron Lipman, Ricky TQ Chen, Heli Ben-Hamu, Maximilian Nickel, and Matthew Le. Flow matching for generative modeling. In *The Eleventh International Conference on Learning Representations*, 2023.
- [22] Nikolay Malkin, Moksh Jain, Emmanuel Bengio, Chen Sun, and Yoshua Bengio. Trajectory balance: Improved credit assignment in gflownets. *Advances in Neural Information Processing Systems*, 35:5955–5967, 2022.
- [23] Nicholas Metropolis, Arianna W Rosenbluth, Marshall N Rosenbluth, Augusta H Teller, and Edward Teller. Equation of state calculations by fast computing machines. *The journal of chemical physics*, 21(6):1087–1092, 1953.
- [24] Mark EJ Newman and Gerard T Barkema. *Monte Carlo methods in statistical physics*. Clarendon Press, 1999.
- [25] RuiKang OuYang, Bo Qiang, Zixing Song, and José Miguel Hernández-Lobato. Bnem: A boltzmann sampler based on bootstrapped noised energy matching. *arXiv preprint arXiv:2409.09787*, 2024.
- [26] Lorenz Richter and Julius Berner. Improved sampling via learned diffusions. *arXiv preprint arXiv:2307.01198*, 2023.
- [27] Christian P Robert, George Casella, and George Casella. *Monte Carlo statistical methods*, volume 2. Springer, 1999.
- [28] Gareth O Roberts and Richard L Tweedie. Exponential convergence of langevin distributions and their discrete approximations. 1996.
- [29] Robin Rombach, Andreas Blattmann, Dominik Lorenz, Patrick Esser, and Björn Ommer. High-resolution image synthesis with latent diffusion models. In *Proceedings of the IEEE/CVF conference on computer vision and pattern recognition*, pages 10684–10695, 2022.
- [30] Yang Song, Jascha Sohl-Dickstein, Diederik P Kingma, Abhishek Kumar, Stefano Ermon, and Ben Poole. Score-based generative modeling through stochastic differential equations. *arXiv preprint arXiv:2011.13456*, 2020.
- [31] Yifeng Tian, Nishant Panda, and Yen Ting Lin. Liouville flow importance sampler. In *Proceedings of the 41st International Conference on Machine Learning*, pages 48186–48210, 2024.
- [32] Francisco Vargas, Will Grathwohl, and Arnaud Doucet. Denoising diffusion samplers. *arXiv preprint arXiv:2302.13834*, 2023.
- [33] Francisco Vargas, Shreyas Padhy, Denis Blessing, and Nikolas Nüsken. Transport meets variational inference: Controlled monte carlo diffusions. *arXiv preprint arXiv:2307.01050*, 2023.
- [34] Dongyeop Woo and Sungsoo Ahn. Iterated energy-based flow matching for sampling from boltzmann densities. *arXiv preprint arXiv:2408.16249*, 2024.
- [35] Dinghuai Zhang, Ricky TQ Chen, Nikolay Malkin, and Yoshua Bengio. Unifying generative models with gflownets and beyond. *arXiv preprint arXiv:2209.02606*, 2022.
- [36] Qinsheng Zhang and Yongxin Chen. Path integral sampler: a stochastic control approach for sampling. *arXiv preprint arXiv:2111.15141*, 2021.

- 388 [37] Ruixiang Zhang, Shuangfei Zhai, Yizhe Zhang, James Thornton, Zijing Ou, Joshua Susskind,  
389 and Navdeep Jaitly. Target concrete score matching: A holistic framework for discrete diffusion.  
390 *arXiv preprint arXiv:2504.16431*, 2025.
- 391 [38] Serge Lang. Real and functional analysis, volume 142. Springer Science & Business Media,  
392 2012.
- 393 [39] Mark HA Davis. Piecewise-deterministic markov processes: A general class of non-diffusion  
394 stochastic models. *Journal of the Royal Statistical Society: Series B (Methodological)*,  
395 46(3):353–376, 1984.
- 396 [40] Rémi Flamary, Nicolas Courty, Alexandre Gramfort, Mokhtar Z. Alaya, Aurélie Boisbunon,  
397 Stanislas Chambon, Laetitia Chapel, Adrien Corenflos, Kilian Fatras, Nemo Fournier, Léo  
398 Gautheron, Nathalie T.H. Gayraud, Hicham Janati, Alain Rakotomamonjy, Ievgen Redko,  
399 Antoine Rolet, Antony Schutz, Vivien Seguy, Danica J. Sutherland, Romain Tavenard, Alexander  
400 Tong, and Titouan Vayer. Pot: Python optimal transport. *Journal of Machine Learning Research*,  
401 22(78):1–8, 2021. URL <http://jmlr.org/papers/v22/20-451.html>.
- 402 [41] Itai Gat, Tal Remez, Neta Shaul, Felix Kreuk, Ricky TQ Chen, Gabriel Synnaeve, Yossi Adi, and  
403 Yaron Lipman. Discrete flow matching. *Advances in Neural Information Processing Systems*,  
404 37:133345–133385, 2024
- 405 [42] Bálint Máté and François Fleuret. Learning interpolations between boltzmann densities. *Trans-*  
406 *actions on Machine Learning Research*, 2023.
